# Supplementary material
Source: PubMed Central journal article supplement (PMC4061399)
Supplement: NIHMS34538-supplement-Suppl_Uellen_2010.pdf [file NIHMS34538-supplement-Suppl_Uellen_2010.pdf]

## SUPPLEMENTARY DATA

### **Mouse brain plasmalogens are targets for hypochlorous acid-mediated modification *in vitro* and *in vivo***

Andreas Üllen, Günter Fauler, Harald Köfeler, Sabine Walzl, Christoph Nussold, Eva Bernhart, Helga Reicher, Hans-Jörg Leis, Andrea Wintersperger, Ernst Malle, Wolfgang Sattler

**Fig. I: Summary of 2-Cl[<sup>13</sup>C<sub>8</sub>]HDA synthesis as outlined in Materials and methods**

**Fig. II: FT-ICR-MS analyses of phosphatidylinositol (A) and phosphatidylserine (B) subspecies composition**

C57BL/6 mice were killed by cervical dislocation, brains were removed, homogenized in liquid N<sub>2</sub>, lipids were extracted (twice) using a modified Folch extraction, dried under N<sub>2</sub>, redissolved in CHCl<sub>3</sub>/MeOH (1:1, v/v), and analyzed by a hybrid linear ion trap FT-ICR-MS in positive ESI mode as described in Materials and Methods. The corresponding m/z values and detailed percentage composition are given in Table I of the Supplement.

**Fig. III: NICI-GC-MS analysis of 2-ClHDA and 2-Cl[<sup>13</sup>C<sub>8</sub>]HDA**

Total ion current traces (left panel) and the corresponding full scan NICI spectra (right panel) of 2-ClHDA (A) and 2-Cl[<sup>13</sup>C<sub>8</sub>]HDA (B) PFB-oxime derivatives (0.5 nmoles injected). Potential fragmentation patterns and isotope distribution of the molecular ions are shown in the insets. Peaks eluting at 14.78 and 14.94 min correspond to the syn- and anti-isomers of 2-ClHDA PFB-oxime derivatives. Mass assignment is indicated in the insets.

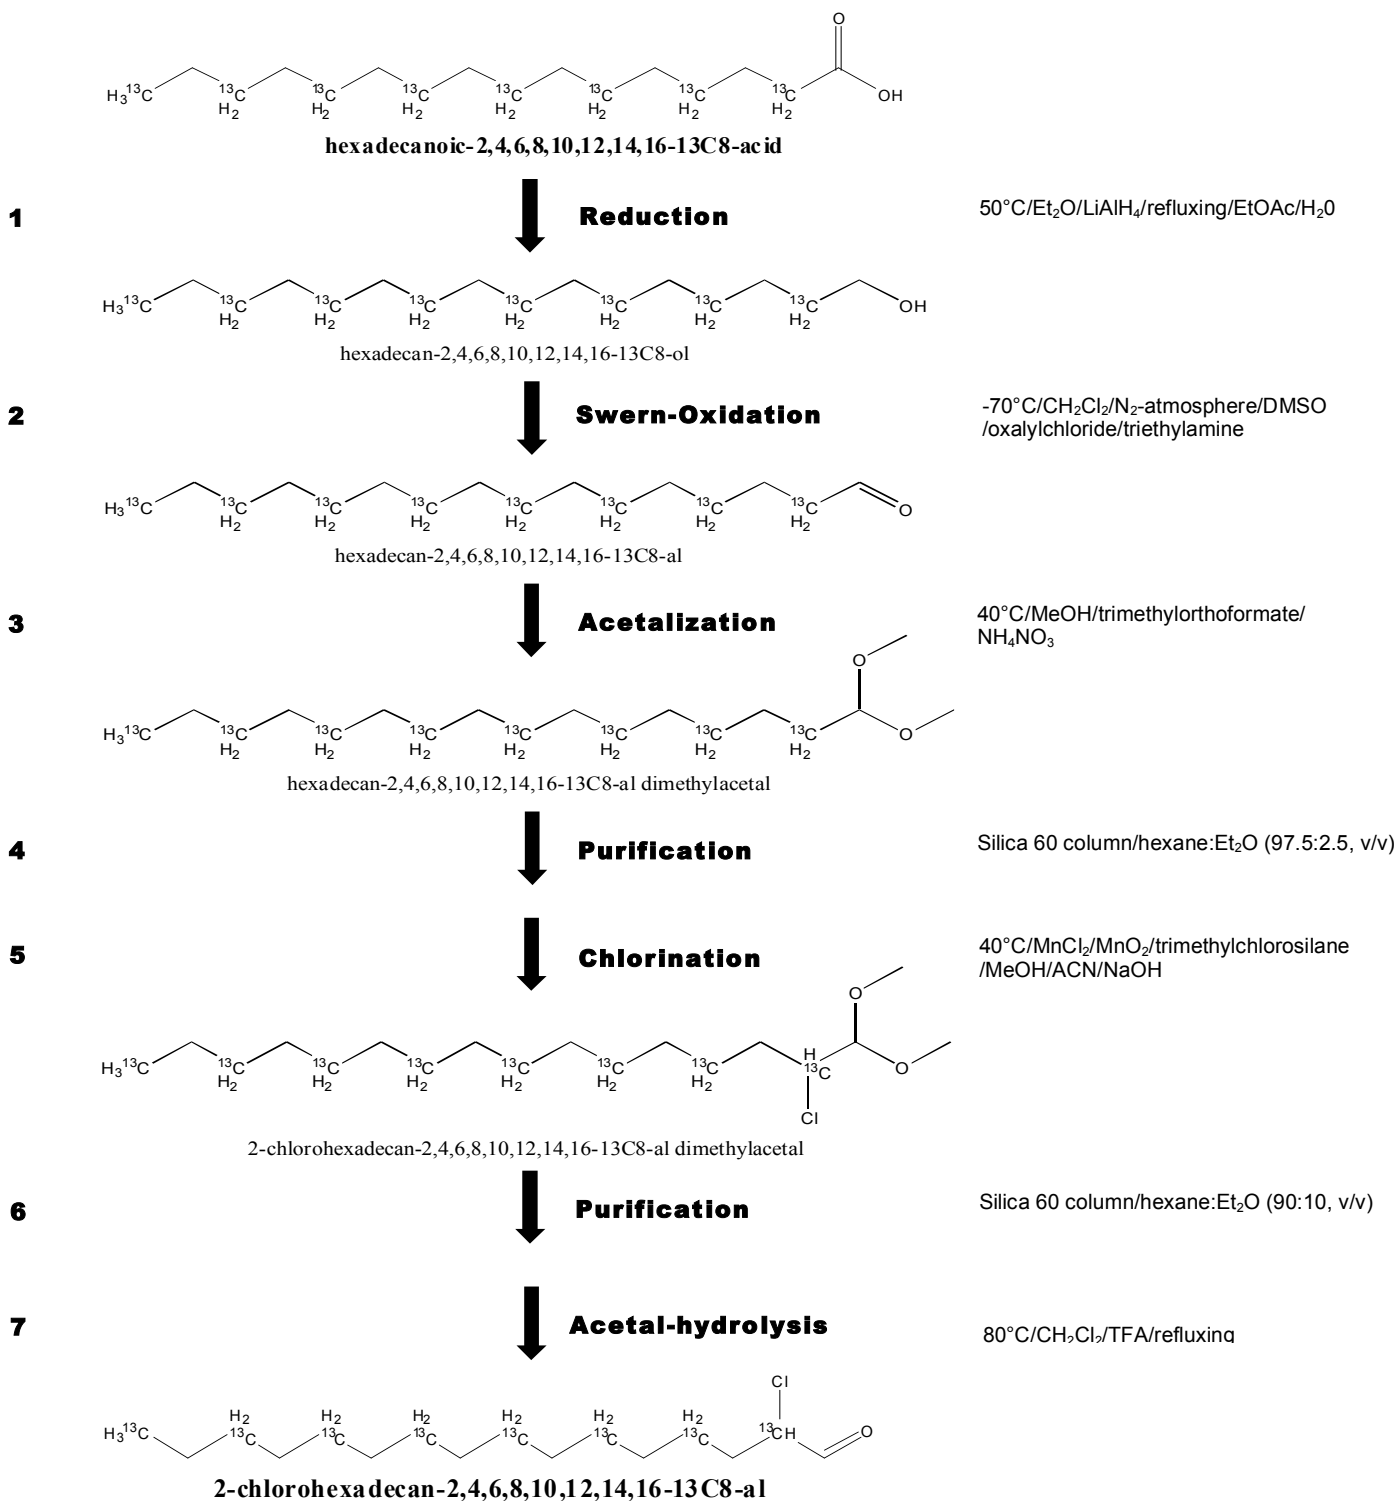

Fig. 1

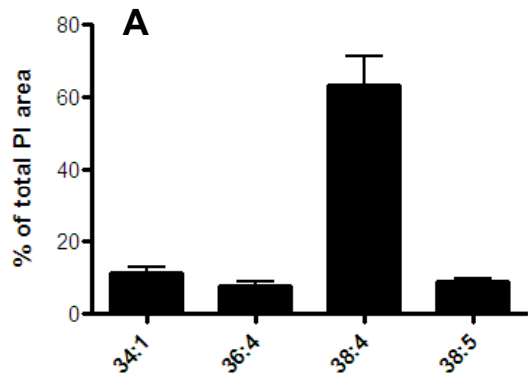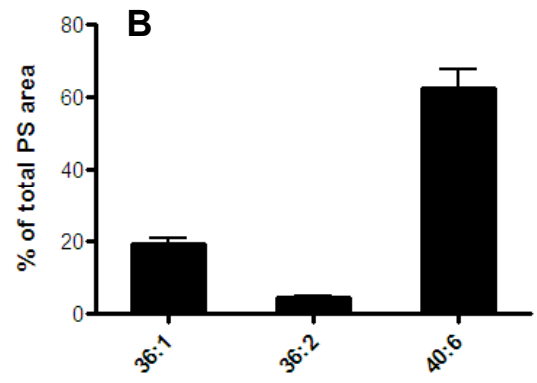

Fig. II

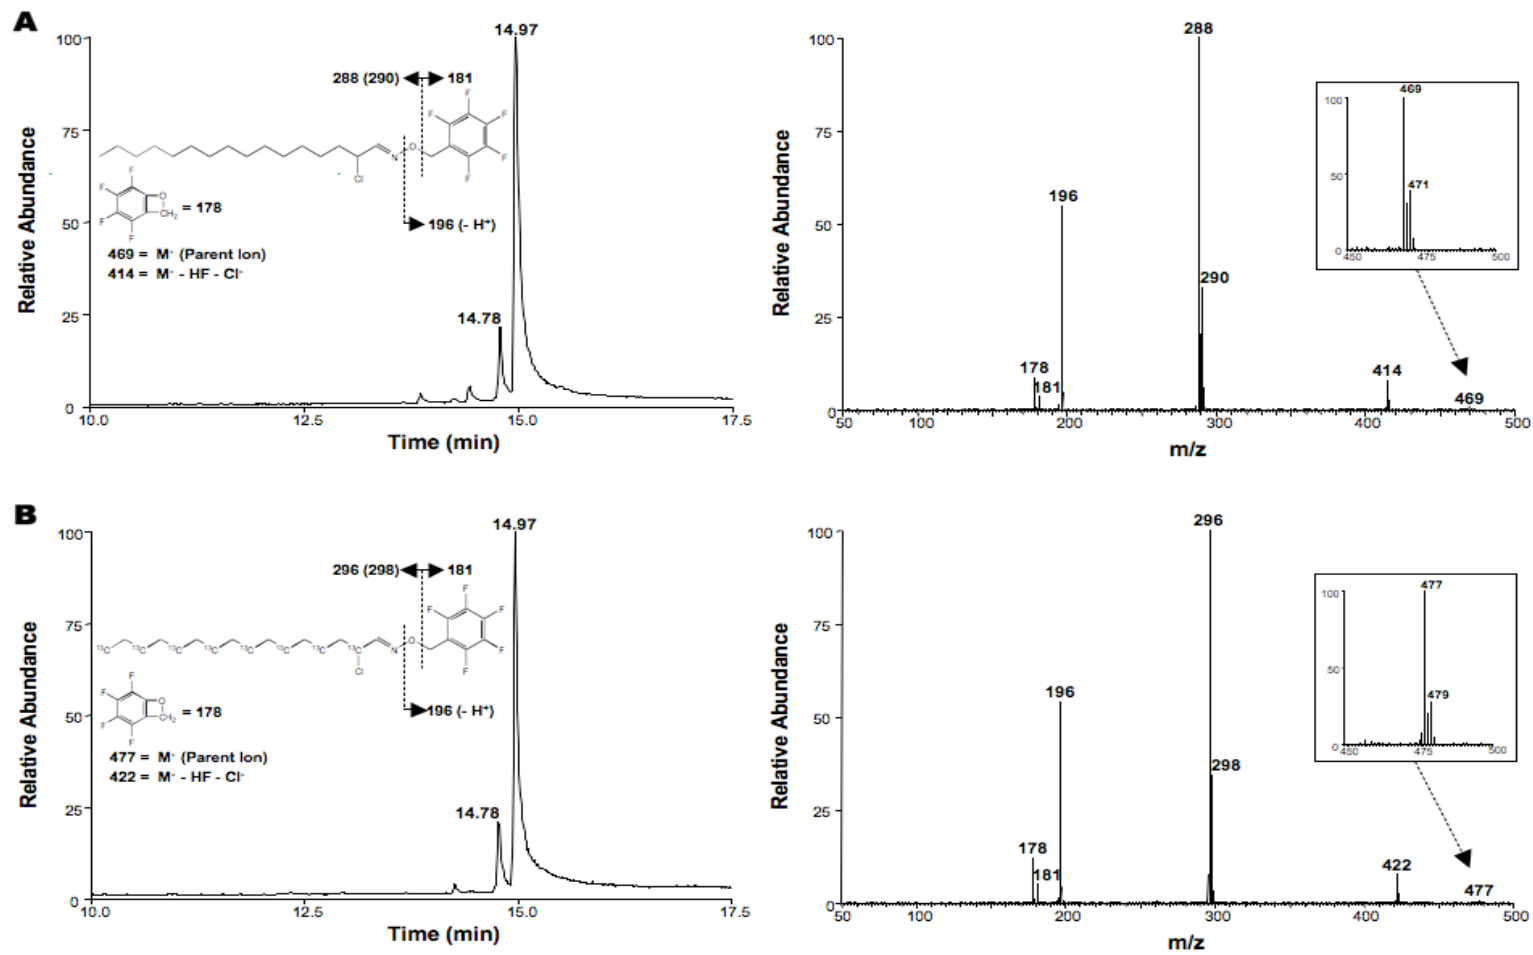

Fig. III

**TABLE I: Percentage composition of C57BL/6 brain glycerophospholipids**

Brain lipids were extracted and analyzed by FT-ICR-MS as described in Materials and Methods. Results shown are mean  $\pm$  SD from three different brains.

| Phosphatidylcholine |        |                         |         |       |
|---------------------|--------|-------------------------|---------|-------|
| Species             | m/z    | m/z (+ H <sup>+</sup> ) | Mean    | SD    |
| 30:0                | 705.53 | 706.54                  | 0.28%   | 0.05% |
| 32:0                | 733.56 | 734.57                  | 17.04%  | 2.58% |
| 32:1                | 731.55 | 732.55                  | 1.23%   | 0.22% |
| 34:0                | 761.59 | 762.60                  | 4.63%   | 0.74% |
| 34:1                | 759.58 | 760.59                  | 37.56%  | 5.84% |
| 34:2                | 757.56 | 758.57                  | 0.81%   | 0.13% |
| 34:3                | 755.55 | 756.55                  | 0.16%   | 0.01% |
| 36:0                | 789.62 | 790.63                  | 0.09%   | 0.01% |
| 36:1                | 787.61 | 788.62                  | 13.56%  | 2.34% |
| 36:2                | 785.59 | 786.60                  | 2.92%   | 0.53% |
| 36:3                | 783.58 | 784.59                  | 0.09%   | 0.00% |
| 36:4                | 781.56 | 782.57                  | 5.07%   | 0.75% |
| 38:1                | 815.64 | 816.65                  | 0.68%   | 0.17% |
| 38:2                | 813.62 | 814.63                  | 0.50%   | 0.10% |
| 38:4                | 809.59 | 810.60                  | 4.83%   | 0.69% |
| 38:5                | 807.58 | 808.59                  | 1.64%   | 0.35% |
| 38:6                | 805.56 | 806.57                  | 4.29%   | 0.70% |
| 38:7                | 803.55 | 804.55                  | 0.10%   | 0.01% |
| 40:1                | 843.67 | 844.68                  | 0.16%   | 0.04% |
| 40:2                | 841.66 | 842.66                  | 0.16%   | 0.04% |
| 40:4                | 837.62 | 838.63                  | 0.35%   | 0.05% |
| 40:6                | 833.59 | 834.60                  | 2.69%   | 0.50% |
| 40:7                | 831.58 | 832.59                  | 0.88%   | 0.17% |
| 42:1                | 871.70 | 872.71                  | 0.16%   | 0.05% |
| 42:2                | 869.69 | 870.69                  | 0.10%   | 0.03% |
| Sum                 |        |                         | 100.00% |       |

| Plasmenyl Phosphatidylcholine |        |                         |        |       |
|-------------------------------|--------|-------------------------|--------|-------|
| Species                       | m/z    | m/z (+ H <sup>+</sup> ) | Mean   | SD    |
| 32:0                          | 717.57 | 718.58                  | 8.15%  | 0.82% |
| 32:1                          | 715.55 | 716.56                  | 3.08%  | 0.88% |
| 34:0                          | 745.60 | 746.61                  | 53.70% | 6.07% |
| 34:1                          | 743.58 | 744.59                  | 11.08% | 3.68% |
| 36:0                          | 773.63 | 774.64                  | 6.54%  | 0.65% |
| 36:1                          | 771.61 | 772.62                  | 8.84%  | 2.16% |
| 36:2                          | 769.60 | 770.61                  | 4.93%  | 2.03% |
| 38:1                          | 799.65 | 800.65                  | 3.01%  | 0.75% |
| 40:0                          | 829.69 | 830.70                  | 0.25%  | 0.11% |
| 40:1                          | 827.68 | 828.68                  | 0.42%  | 0.07% |
| Sum                           |        |                         | 100.0% |       |

| Phosphatidylethanolamine |        |                         |         |       |
|--------------------------|--------|-------------------------|---------|-------|
| Species                  | m/z    | m/z (+ H <sup>+</sup> ) | Mean    | SD    |
| 34:0                     | 719.55 | 720.55                  | 1.03%   | 0.18% |
| 34:1                     | 717.53 | 718.54                  | 2.49%   | 0.25% |
| 36:0                     | 747.58 | 748.59                  | 0.98%   | 0.11% |
| 36:1                     | 745.56 | 746.57                  | 5.89%   | 0.53% |
| 36:2                     | 743.55 | 744.55                  | 3.48%   | 0.23% |
| 36:4                     | 739.52 | 740.52                  | 2.01%   | 0.18% |
| 38:1                     | 773.59 | 774.60                  | 2.80%   | 0.53% |
| 38:2                     | 771.58 | 772.59                  | 0.51%   | 0.11% |
| 38:4                     | 767.55 | 768.55                  | 22.34%  | 2.27% |
| 38:5                     | 765.53 | 766.54                  | 3.62%   | 0.23% |
| 38:6                     | 763.52 | 764.52                  | 8.04%   | 0.89% |
| 40:1                     | 801.62 | 802.63                  | 0.45%   | 0.01% |
| 40:4                     | 795.58 | 796.59                  | 4.43%   | 0.60% |
| 40:5                     | 793.56 | 794.57                  | 0.76%   | 0.11% |
| 40:6                     | 791.55 | 792.55                  | 38.69%  | 3.71% |
| 40:7                     | 789.53 | 790.54                  | 2.47%   | 0.20% |
| Sum                      |        |                         | 100.00% |       |

| Plasmenyl Phosphatidylethanolamine |        |                         |        |       |
|------------------------------------|--------|-------------------------|--------|-------|
| Species                            | m/z    | m/z (+ H <sup>+</sup> ) | Mean   | SD    |
| 32:0                               | 675.52 | 676.53                  | 0.04%  | 0.01% |
| 34:0                               | 703.55 | 704.56                  | 0.29%  | 0.02% |
| 34:1                               | 701.54 | 702.54                  | 5.23%  | 0.53% |
| 36:1                               | 729.57 | 730.58                  | 11.28% | 1.13% |
| 36:2                               | 727.55 | 728.56                  | 11.52% | 0.88% |
| 36:4                               | 723.52 | 724.53                  | 1.69%  | 0.17% |
| 38:0                               | 759.61 | 760.62                  | 1.73%  | 0.21% |
| 38:1                               | 757.60 | 758.61                  | 5.48%  | 0.77% |
| 38:2                               | 755.58 | 756.59                  | 6.44%  | 0.62% |
| 38:4                               | 751.55 | 752.56                  | 9.83%  | 0.98% |
| 38:5                               | 749.54 | 750.54                  | 6.66%  | 0.58% |
| 38:6                               | 747.52 | 748.53                  | 8.90%  | 0.85% |
| 40:1                               | 785.63 | 786.64                  | 0.31%  | 0.04% |
| 40:2                               | 783.61 | 784.62                  | 0.78%  | 0.09% |
| 40:4                               | 779.58 | 780.59                  | 5.59%  | 0.68% |
| 40:6                               | 775.55 | 776.56                  | 19.81% | 1.07% |
| 40:7                               | 773.54 | 774.54                  | 4.41%  | 0.35% |
| Sum                                |        |                         | 100.0% |       |

| Phosphatidylinositol |        |                         |         |       |
|----------------------|--------|-------------------------|---------|-------|
| Species              | m/z    | m/z (- H <sup>+</sup> ) | Mean    | SD    |
| 34:1                 | 836.54 | 835.53                  | 11.33%  | 1.46% |
| 36:0                 | 866.59 | 865.58                  | 1.79%   | 0.55% |
| 36:4                 | 858.53 | 857.52                  | 7.57%   | 1.32% |
| 38:0                 | 894.62 | 893.61                  | 2.32%   | 1.71% |
| 38:4                 | 886.56 | 885.55                  | 63.09%  | 8.28% |
| 38:5                 | 884.54 | 883.53                  | 8.67%   | 1.06% |
| 38:6                 | 882.53 | 881.52                  | 1.73%   | 0.64% |
| 40:6                 | 910.56 | 909.55                  | 3.30%   | 0.81% |
| 40:7                 | 908.54 | 907.53                  | 0.19%   | 0.02% |
| Sum                  |        |                         | 100.00% |       |

| Phosphatidylserine |        |                         |         |       |
|--------------------|--------|-------------------------|---------|-------|
| Species            | m/z    | m/z (+ H <sup>+</sup> ) | Mean    | SD    |
| 34:1               | 761.52 | 762.53                  | 0.97%   | 0.07% |
| 36:1               | 789.55 | 790.56                  | 19.36%  | 1.28% |
| 36:2               | 787.54 | 788.54                  | 4.31%   | 0.43% |
| 38:1               | 817.58 | 818.59                  | 2.87%   | 0.24% |
| 38:4               | 811.54 | 812.54                  | 3.20%   | 0.27% |
| 40:1               | 845.61 | 846.62                  | 1.13%   | 0.29% |
| 40:4               | 839.57 | 840.57                  | 3.46%   | 0.19% |
| 40:5               | 837.55 | 838.56                  | 0.97%   | 0.16% |
| 40:6               | 835.54 | 836.54                  | 62.60%  | 5.22% |
| 40:7               | 833.52 | 834.53                  | 1.13%   | 0.20% |
| Sum                |        |                         | 100.00% |       |
